# Supplementary material
Source: Research Square preprint supplement (doi:10.21203/rs.3.rs-10263312/v1)
Supplement: Supplementary file 1 [file 466d12499b1ff9543cd91722.docx]

**Table 2. Rare earth element compositions of ceramic samples (μg/g)**

| **Sample** | **La** | **Ce** | **Pr** | **Nd** | **Sm** | **Eu** | **Gd** | **Tb** | **Dy** | **Ho** | **Er** | **Tm** | **Yb** | **Lu** | **Y** |
| --- | --- | --- | --- | --- | --- | --- | --- | --- | --- | --- | --- | --- | --- | --- | --- |
| ZQ-1 | 60.39 | 118.49 | 11.01 | 33.96 | 5.33 | 0.98 | 4.90 | 0.91 | 5.91 | 1.30 | 3.82 | 0.59 | 3.99 | 0.61 | 31.19 |
| ZQ-2 | 63.15 | 130.17 | 13.15 | 44.75 | 8.59 | 1.59 | 7.65 | 1.26 | 7.59 | 1.59 | 4.40 | 0.66 | 4.39 | 0.66 | 37.65 |
| ZQ-3 | 61.38 | 129.61 | 13.94 | 50.25 | 8.94 | 1.55 | 6.88 | 1.04 | 6.25 | 1.33 | 3.70 | 0.56 | 3.77 | 0.57 | 31.64 |
| ZQ-4 | 71.61 | 149.61 | 16.22 | 59.04 | 10.82 | 1.91 | 8.90 | 1.34 | 7.67 | 1.63 | 4.49 | 0.66 | 4.32 | 0.65 | 40.10 |
| ZQ-5 | 80.76 | 174.40 | 18.79 | 67.66 | 12.10 | 2.34 | 9.54 | 1.37 | 7.81 | 1.64 | 4.48 | 0.66 | 4.35 | 0.65 | 39.05 |
| ZQ-6 | 61.57 | 128.66 | 14.27 | 49.91 | 8.36 | 1.23 | 6.40 | 1.01 | 6.24 | 1.34 | 3.81 | 0.58 | 3.75 | 0.56 | 31.45 |
| ZQ-7 | 62.92 | 131.37 | 14.01 | 49.61 | 8.73 | 1.36 | 6.91 | 1.04 | 6.10 | 1.25 | 3.49 | 0.51 | 3.36 | 0.49 | 30.06 |
| ZQ-8 | 79.48 | 151.86 | 16.82 | 59.61 | 9.85 | 1.54 | 8.04 | 1.19 | 7.24 | 1.59 | 4.51 | 0.69 | 4.58 | 0.70 | 38.60 |
| ZQ-9 | 63.05 | 129.92 | 14.38 | 50.15 | 8.37 | 1.24 | 6.70 | 1.06 | 6.38 | 1.38 | 3.86 | 0.58 | 3.77 | 0.57 | 32.63 |
| ZQ-10 | 62.80 | 119.05 | 13.15 | 47.04 | 8.74 | 1.75 | 6.72 | 0.96 | 5.35 | 1.13 | 3.11 | 0.47 | 3.00 | 0.45 | 27.22 |
| ZQ-11 | 52.11 | 113.39 | 12.08 | 42.99 | 7.73 | 1.30 | 6.38 | 1.03 | 6.20 | 1.29 | 3.61 | 0.54 | 3.51 | 0.52 | 30.23 |
| ZQ-12 | 85.87 | 180.63 | 20.50 | 71.97 | 13.44 | 2.38 | 10.99 | 1.59 | 8.82 | 1.75 | 4.65 | 0.68 | 4.34 | 0.62 | 41.28 |
| ZQ-13 | 46.40 | 90.08 | 10.17 | 36.53 | 6.73 | 1.38 | 5.73 | 0.85 | 4.78 | 0.97 | 2.74 | 0.41 | 2.69 | 0.41 | 23.73 |
| ZQ-14 | 69.64 | 146.86 | 16.51 | 58.29 | 10.37 | 1.95 | 8.59 | 1.30 | 7.43 | 1.57 | 4.26 | 0.62 | 3.97 | 0.59 | 34.60 |
| ZQ-15 | 44.48 | 92.89 | 10.14 | 35.14 | 6.35 | 1.14 | 5.12 | 0.80 | 4.69 | 1.00 | 2.75 | 0.41 | 2.68 | 0.40 | 22.16 |
| ZQ-16 | 58.15 | 122.61 | 13.18 | 46.72 | 8.30 | 1.37 | 6.59 | 0.98 | 5.58 | 1.16 | 3.18 | 0.47 | 3.00 | 0.44 | 26.07 |
| ZQ-17 | 68.14 | 141.98 | 14.78 | 50.94 | 9.44 | 1.83 | 7.25 | 1.06 | 6.36 | 1.37 | 3.91 | 0.60 | 4.08 | 0.59 | 32.55 |
| ZQ-18 | 73.55 | 151.55 | 17.26 | 62.14 | 13.54 | 1.44 | 8.49 | 1.27 | 7.43 | 1.60 | 4.33 | 0.63 | 4.08 | 0.59 | 39.51 |
| ZQ-19 | 87.85 | 180.25 | 20.70 | 68.96 | 14.02 | 1.79 | 10.08 | 1.56 | 8.77 | 1.85 | 4.95 | 0.75 | 4.90 | 0.71 | 41.98 |
| ZQ-20 | 132.08 | 288.02 | 33.11 | 121.41 | 24.20 | 4.16 | 18.15 | 2.57 | 13.81 | 2.82 | 7.42 | 1.07 | 6.84 | 1.02 | 65.52 |
| ZQ-21 | 36.76 | 75.09 | 8.00 | 27.91 | 5.85 | 0.87 | 4.12 | 0.64 | 3.68 | 0.78 | 2.16 | 0.33 | 2.16 | 0.32 | 18.23 |
| ZQ-22 | 71.06 | 143.74 | 15.93 | 56.19 | 11.62 | 1.72 | 8.23 | 1.24 | 6.98 | 1.45 | 3.91 | 0.57 | 3.77 | 0.55 | 33.29 |
| ZQ-23 | 77.31 | 154.80 | 15.35 | 50.08 | 9.33 | 1.47 | 6.94 | 1.14 | 7.06 | 1.57 | 4.40 | 0.66 | 4.33 | 0.64 | 34.83 |
| ZQ-24 | 62.82 | 123.61 | 12.70 | 41.27 | 7.74 | 1.22 | 6.05 | 1.05 | 6.55 | 1.41 | 3.96 | 0.59 | 3.94 | 0.57 | 33.08 |
| ZQ-25 | 67.55 | 139.88 | 15.76 | 56.68 | 11.84 | 1.75 | 8.54 | 1.25 | 7.18 | 1.50 | 4.12 | 0.60 | 3.94 | 0.58 | 33.70 |
| ZQ-26 | 62.71 | 133.14 | 14.27 | 51.29 | 10.92 | 1.78 | 7.60 | 1.12 | 6.34 | 1.29 | 3.53 | 0.52 | 3.36 | 0.49 | 29.45 |
| ZQ-27 | 77.71 | 153.07 | 15.80 | 52.35 | 9.94 | 1.50 | 7.30 | 1.17 | 6.92 | 1.48 | 4.15 | 0.62 | 4.13 | 0.60 | 34.23 |
| ZQ-28 | 53.68 | 107.85 | 12.51 | 44.29 | 9.27 | 1.41 | 6.54 | 1.02 | 6.03 | 1.30 | 3.50 | 0.52 | 3.41 | 0.50 | 29.23 |
| ZQ-29 | 72.21 | 143.83 | 13.34 | 39.88 | 6.62 | 1.07 | 5.64 | 1.10 | 7.25 | 1.63 | 4.48 | 0.68 | 4.48 | 0.65 | 35.83 |
| ZQ-30 | 66.90 | 132.76 | 13.76 | 44.53 | 8.15 | 1.24 | 6.28 | 1.11 | 6.97 | 1.52 | 4.24 | 0.64 | 4.25 | 0.62 | 35.06 |
| ZQ-31 | 57.08 | 111.51 | 11.39 | 37.23 | 7.07 | 1.04 | 5.06 | 0.84 | 5.22 | 1.13 | 3.24 | 0.50 | 3.33 | 0.49 | 25.44 |
| ZQ-32 | 71.15 | 144.49 | 13.40 | 40.01 | 6.66 | 1.04 | 5.49 | 1.05 | 7.01 | 1.56 | 4.32 | 0.64 | 4.26 | 0.61 | 35.60 |
| ZQ-33 | 68.38 | 135.12 | 13.75 | 43.72 | 8.11 | 1.15 | 5.79 | 1.02 | 6.41 | 1.37 | 3.86 | 0.60 | 4.01 | 0.60 | 30.12 |
| ZQ-34 | 64.83 | 129.16 | 12.49 | 38.68 | 6.67 | 1.06 | 5.42 | 1.02 | 6.75 | 1.47 | 4.06 | 0.62 | 4.04 | 0.59 | 33.91 |
| ZQ-35 | 94.48 | 185.11 | 18.26 | 59.60 | 11.43 | 1.72 | 8.64 | 1.50 | 9.48 | 2.09 | 5.82 | 0.88 | 5.83 | 0.86 | 47.38 |
| ZQ-36 | 82.73 | 160.28 | 14.96 | 45.22 | 7.74 | 1.27 | 6.90 | 1.28 | 8.46 | 1.86 | 5.16 | 0.77 | 4.85 | 0.72 | 45.28 |
| ZQ-37 | 49.25 | 102.15 | 11.05 | 39.05 | 7.86 | 1.16 | 5.36 | 0.86 | 5.11 | 1.11 | 3.10 | 0.46 | 3.07 | 0.46 | 26.06 |
| ZQ-38 | 64.83 | 126.40 | 12.06 | 37.09 | 6.59 | 1.07 | 5.44 | 1.03 | 6.76 | 1.48 | 4.07 | 0.61 | 3.97 | 0.58 | 34.51 |
| ZQ-39 | 78.26 | 152.19 | 14.94 | 48.19 | 9.07 | 1.37 | 7.31 | 1.29 | 8.01 | 1.76 | 4.82 | 0.73 | 4.69 | 0.69 | 41.08 |
| ZQ-40 | 77.72 | 160.91 | 18.35 | 62.73 | 13.15 | 2.01 | 8.99 | 1.32 | 7.50 | 1.54 | 4.11 | 0.61 | 3.94 | 0.59 | 36.16 |
| ZQ-41 | 75.04 | 149.64 | 14.87 | 47.26 | 9.18 | 1.38 | 7.15 | 1.25 | 8.00 | 1.69 | 4.70 | 0.69 | 4.49 | 0.66 | 39.47 |
| ZQ-42 | 62.19 | 128.46 | 14.09 | 50.55 | 10.67 | 1.73 | 7.47 | 1.12 | 6.31 | 1.32 | 3.50 | 0.52 | 3.39 | 0.51 | 31.74 |
| ZQ-43 | 50.52 | 103.97 | 11.35 | 40.46 | 8.30 | 1.27 | 5.79 | 0.89 | 5.30 | 1.11 | 3.10 | 0.46 | 3.06 | 0.47 | 26.34 |
| ZQ-44 | 46.52 | 96.64 | 10.83 | 38.71 | 7.99 | 1.26 | 5.50 | 0.86 | 5.12 | 1.10 | 3.04 | 0.45 | 3.01 | 0.44 | 25.26 |
| ZQ-45 | 71.39 | 150.44 | 15.57 | 55.51 | 11.29 | 1.81 | 7.75 | 1.14 | 6.36 | 1.30 | 3.47 | 0.51 | 3.28 | 0.47 | 30.22 |
| ZQ-46 | 46.65 | 98.76 | 10.74 | 38.27 | 7.86 | 1.26 | 5.42 | 0.82 | 4.93 | 1.06 | 2.94 | 0.45 | 2.94 | 0.44 | 24.51 |
| ZQ-47 | 50.91 | 105.40 | 11.33 | 39.75 | 8.19 | 1.37 | 5.82 | 0.89 | 5.22 | 1.09 | 2.97 | 0.45 | 2.94 | 0.43 | 25.93 |
| ZQ-48 | 47.30 | 98.18 | 10.62 | 37.41 | 7.67 | 1.23 | 5.29 | 0.84 | 5.08 | 1.10 | 3.07 | 0.46 | 3.04 | 0.46 | 25.90 |
