# Supplementary material
Source: Research Square preprint supplement (doi:10.21203/rs.3.rs-10263312/v1)
Supplement: Supplementary file 2 [file 63881613a3c948149c374a4f.docx]

**Table 1. Trace element compositions of ceramic samples (μg/g)**

| **Sample** | **Li** | **Be** | **P** | **Sc** | **Ti** | **V** | **Cr** | **Mn** | **Co** | **Ni** | **Cu** | **Zn** | **Ga** | **Rb** | **Sr** | **Y** | **Zr** | **Nb** | **Sn** | **Cs** | **Ba** | **Hf** | **Ta** | **Pb** | **Th** | **U** |
| --- | --- | --- | --- | --- | --- | --- | --- | --- | --- | --- | --- | --- | --- | --- | --- | --- | --- | --- | --- | --- | --- | --- | --- | --- | --- | --- |
| ZQ-1 | 76.33 | 1.90 | 332.51 | 22.35 | 9652.29 | 183.80 | 140.29 | 52.83 | 10.63 | 1200.12 | 30.53 | 33.73 | 38.84 | 95.58 | 127.07 | 31.19 | 513.92 | 48.32 | 7.79 | 19.26 | 258.45 | 15.47 | 3.41 | 23.86 | 34.82 | 6.38 |
| ZQ-2 | 118.15 | 2.41 | 294.72 | 21.19 | 10471.14 | 137.14 | 113.73 | 54.43 | 6.62 | 287.71 | 14.72 | 122.29 | 42.97 | 75.88 | 108.04 | 37.65 | 530.44 | 57.52 | 9.19 | 17.57 | 199.72 | 16.36 | 4.01 | 33.43 | 36.10 | 5.83 |
| ZQ-3 | 394.73 | 2.72 | 483.60 | 23.37 | 5584.10 | 181.65 | 95.23 | 126.86 | 10.31 | 108.37 | 15.79 | 49.84 | 32.06 | 62.56 | 101.48 | 31.64 | 408.07 | 24.17 | 3.62 | 6.27 | 299.48 | 12.61 | 1.55 | 27.69 | 23.09 | 5.13 |
| ZQ-4 | 282.93 | 3.61 | 501.07 | 23.04 | 6170.24 | 137.59 | 82.52 | 102.31 | 9.68 | 269.30 | 20.97 | 46.74 | 35.62 | 67.55 | 121.43 | 40.10 | 434.38 | 27.94 | 5.65 | 6.37 | 336.96 | 13.19 | 1.91 | 43.84 | 27.04 | 3.94 |
| ZQ-5 | 174.46 | 2.56 | 461.39 | 25.39 | 6468.16 | 169.85 | 97.76 | 154.28 | 10.06 | 186.42 | 20.07 | 61.53 | 36.53 | 91.35 | 134.62 | 39.05 | 450.69 | 28.88 | 3.99 | 8.59 | 355.34 | 13.79 | 1.88 | 27.75 | 27.84 | 4.96 |
| ZQ-6 | 63.11 | 1.71 | 275.76 | 38.10 | 9055.32 | 123.61 | 108.95 | 22.45 | 4.15 | 22.02 | 6.28 | 31.91 | 34.68 | 86.38 | 100.12 | 35.83 | 402.96 | 44.27 | 2.85 | 17.62 | 167.02 | 13.16 | 3.37 | 15.13 | 42.50 | 5.39 |
| ZQ-7 | 107.58 | 2.16 | 371.19 | 25.87 | 8410.78 | 121.94 | 104.27 | 37.06 | 3.74 | 18.30 | 10.76 | 36.20 | 36.25 | 103.56 | 98.82 | 35.06 | 412.10 | 41.83 | 4.52 | 18.70 | 199.86 | 13.28 | 3.23 | 27.44 | 39.68 | 5.06 |
| ZQ-8 | 47.80 | 1.47 | 505.10 | 21.14 | 6680.51 | 122.66 | 106.22 | 55.03 | 2.01 | 12.32 | 13.69 | 52.76 | 28.15 | 128.74 | 135.84 | 25.44 | 274.08 | 32.42 | 3.80 | 20.25 | 261.19 | 8.92 | 2.55 | 7.38 | 33.96 | 4.76 |
| ZQ-9 | 89.00 | 2.23 | 439.34 | 25.55 | 9004.96 | 124.54 | 114.19 | 47.87 | 4.27 | 12.92 | 9.72 | 32.36 | 35.44 | 91.01 | 102.03 | 35.60 | 391.66 | 44.43 | 3.06 | 17.68 | 190.50 | 12.31 | 3.39 | 15.30 | 41.01 | 5.21 |
| ZQ-10 | 148.85 | 1.82 | 567.24 | 20.62 | 6933.84 | 131.17 | 100.84 | 69.41 | 2.78 | 14.07 | 9.31 | 17.33 | 30.58 | 115.77 | 128.53 | 30.12 | 318.80 | 34.89 | 4.98 | 21.74 | 230.98 | 10.07 | 2.82 | 25.05 | 37.69 | 4.72 |
| ZQ-11 | 134.26 | 2.59 | 302.70 | 24.48 | 8059.66 | 126.26 | 101.90 | 30.59 | 4.52 | 16.14 | 10.41 | 24.71 | 38.13 | 94.17 | 84.54 | 33.91 | 437.69 | 38.69 | 24.10 | 19.11 | 210.65 | 13.57 | 2.86 | 20.11 | 35.05 | 4.79 |
| ZQ-12 | 100.86 | 2.66 | 462.46 | 36.59 | 11032.16 | 208.86 | 248.32 | 50.49 | 4.26 | 11.01 | 27.43 | 37.59 | 48.45 | 173.78 | 175.42 | 47.38 | 542.68 | 54.01 | 6.37 | 33.84 | 327.02 | 16.64 | 4.09 | 52.78 | 57.27 | 7.96 |
| ZQ-13 | 109.30 | 2.22 | 267.22 | 25.05 | 7672.68 | 136.53 | 193.21 | 23.74 | 3.46 | 18.83 | 9.74 | 36.70 | 30.87 | 121.16 | 149.72 | 45.28 | 320.95 | 37.60 | 1.75 | 27.31 | 223.45 | 10.06 | 2.82 | 11.50 | 36.80 | 4.60 |
| ZQ-14 | 19.75 | 3.49 | 179.77 | 27.30 | 5313.56 | 163.81 | 81.99 | 53.24 | 8.54 | 23.35 | 7.90 | 35.48 | 39.10 | 69.58 | 64.27 | 26.06 | 361.32 | 23.00 | 3.55 | 7.72 | 289.04 | 11.48 | 1.55 | 27.88 | 23.13 | 3.82 |
| ZQ-15 | 75.29 | 2.38 | 299.49 | 22.12 | 9211.03 | 113.80 | 129.45 | 24.57 | 4.20 | 13.91 | 6.64 | 35.55 | 35.73 | 75.45 | 78.06 | 34.51 | 413.76 | 45.42 | 2.55 | 18.61 | 150.81 | 12.90 | 3.39 | 17.26 | 39.77 | 4.66 |
| ZQ-16 | 136.15 | 2.11 | 318.05 | 26.32 | 7622.42 | 141.76 | 112.08 | 41.03 | 4.10 | 665.44 | 15.12 | 30.42 | 33.66 | 124.53 | 141.93 | 41.08 | 381.56 | 37.43 | 6.17 | 25.47 | 228.04 | 11.59 | 2.87 | 35.22 | 37.39 | 5.10 |
| ZQ-17 | 25.42 | 3.32 | 284.27 | 24.82 | 6070.76 | 139.61 | 77.96 | 66.12 | 6.51 | 291.14 | 8.63 | 42.56 | 38.82 | 100.55 | 76.96 | 36.16 | 403.93 | 29.51 | 3.94 | 16.03 | 290.31 | 12.27 | 1.99 | 30.00 | 27.14 | 3.92 |
| ZQ-18 | 132.25 | 2.18 | 346.43 | 23.09 | 7359.31 | 136.10 | 103.90 | 45.78 | 3.74 | 332.34 | 13.14 | 30.81 | 31.31 | 122.40 | 145.10 | 39.47 | 361.61 | 35.44 | 13.05 | 24.62 | 233.01 | 11.18 | 2.70 | 30.22 | 36.66 | 4.88 |
| ZQ-19 | 22.52 | 3.76 | 195.24 | 26.44 | 6071.87 | 159.99 | 87.32 | 34.10 | 12.01 | 238.37 | 6.88 | 49.16 | 37.86 | 80.48 | 69.69 | 31.74 | 366.92 | 25.61 | 4.57 | 9.16 | 357.06 | 11.44 | 1.68 | 35.51 | 24.88 | 3.94 |
| ZQ-20 | 12.20 | 3.36 | 158.47 | 25.47 | 5976.88 | 172.24 | 83.62 | 62.02 | 9.04 | 225.56 | 4.83 | 27.58 | 35.77 | 73.46 | 57.19 | 26.34 | 373.67 | 24.11 | 3.69 | 7.67 | 284.89 | 11.77 | 1.60 | 25.27 | 23.37 | 3.82 |
| ZQ-21 | 24.88 | 3.45 | 166.37 | 26.61 | 6646.44 | 188.87 | 93.10 | 48.32 | 9.46 | 33.51 | 13.46 | 31.18 | 37.68 | 76.95 | 60.91 | 25.26 | 358.85 | 27.26 | 5.09 | 9.12 | 242.15 | 11.28 | 1.82 | 27.75 | 25.80 | 4.20 |
| ZQ-22 | 35.99 | 4.53 | 237.29 | 26.23 | 7175.52 | 148.17 | 99.63 | 119.41 | 14.47 | 17.69 | 8.35 | 59.04 | 35.50 | 73.42 | 74.14 | 30.22 | 358.23 | 30.64 | 5.74 | 6.97 | 342.22 | 11.31 | 1.95 | 26.46 | 26.67 | 3.67 |
| ZQ-23 | 13.20 | 3.31 | 169.82 | 25.84 | 6137.87 | 166.00 | 89.97 | 85.15 | 8.23 | 120.08 | 7.53 | 29.50 | 37.49 | 71.01 | 55.96 | 24.51 | 341.61 | 24.84 | 5.12 | 7.46 | 292.23 | 10.79 | 1.68 | 28.02 | 23.35 | 3.48 |
| ZQ-24 | 34.41 | 3.62 | 191.80 | 26.78 | 6167.14 | 157.62 | 85.78 | 40.29 | 10.89 | 441.47 | 15.65 | 52.74 | 38.72 | 80.29 | 66.50 | 25.93 | 351.46 | 25.91 | 4.27 | 9.04 | 387.36 | 10.76 | 1.69 | 29.51 | 24.48 | 3.59 |
| ZQ-25 | 38.67 | 3.95 | 188.62 | 26.96 | 6065.86 | 163.84 | 104.71 | 49.00 | 9.23 | 943.03 | 21.66 | 44.90 | 38.54 | 79.21 | 66.66 | 25.90 | 362.32 | 25.00 | 5.78 | 8.13 | 305.07 | 11.36 | 1.63 | 28.14 | 24.28 | 3.54 |
| ZQ-26 | 20.93 | 3.23 | 202.56 | 24.62 | 6400.53 | 138.01 | 76.01 | 89.84 | 7.28 | 17.76 | 6.23 | 37.24 | 35.47 | 80.12 | 92.17 | 31.45 | 403.82 | 27.61 | 4.04 | 7.88 | 366.26 | 12.19 | 1.83 | 34.46 | 25.07 | 3.54 |
| ZQ-27 | 40.60 | 2.80 | 237.74 | 21.35 | 6485.45 | 125.04 | 79.38 | 105.72 | 12.46 | 25.03 | 7.00 | 78.37 | 34.02 | 92.32 | 81.64 | 30.06 | 362.30 | 29.58 | 5.42 | 10.27 | 349.04 | 11.15 | 1.99 | 27.48 | 25.31 | 3.46 |
| ZQ-28 | 30.16 | 3.91 | 299.54 | 26.35 | 5865.30 | 128.90 | 79.42 | 65.03 | 8.72 | 20.22 | 8.74 | 41.85 | 35.37 | 85.86 | 140.32 | 38.60 | 411.26 | 25.20 | 3.70 | 7.88 | 389.87 | 12.39 | 1.66 | 29.08 | 24.68 | 3.72 |
| ZQ-29 | 18.69 | 3.40 | 286.43 | 24.68 | 6618.46 | 139.17 | 77.68 | 99.51 | 7.25 | 18.22 | 4.64 | 45.55 | 35.19 | 83.02 | 114.26 | 32.63 | 405.16 | 28.30 | 4.10 | 8.08 | 359.25 | 12.38 | 1.84 | 36.48 | 25.74 | 3.72 |
| ZQ-30 | 27.49 | 3.01 | 431.17 | 22.50 | 6089.45 | 119.84 | 76.89 | 74.22 | 9.31 | 24.87 | 4.88 | 54.87 | 36.01 | 59.22 | 104.16 | 27.22 | 383.48 | 27.84 | 4.00 | 5.58 | 221.89 | 11.84 | 1.82 | 30.10 | 26.49 | 3.28 |
| ZQ-31 | 18.96 | 2.59 | 198.49 | 21.59 | 7186.50 | 141.71 | 78.71 | 145.62 | 7.87 | 23.27 | 4.00 | 63.72 | 34.68 | 75.70 | 66.39 | 30.23 | 498.82 | 28.57 | 4.98 | 10.99 | 295.37 | 15.38 | 1.94 | 31.87 | 23.20 | 3.66 |
| ZQ-32 | 60.17 | 3.45 | 580.53 | 26.02 | 6131.65 | 129.17 | 79.19 | 153.83 | 13.09 | 33.35 | 17.49 | 81.06 | 39.22 | 99.48 | 92.35 | 41.28 | 349.28 | 29.25 | 4.56 | 11.17 | 315.46 | 11.08 | 2.01 | 43.95 | 27.66 | 4.67 |
| ZQ-33 | 13.52 | 3.29 | 200.20 | 23.58 | 6248.52 | 175.18 | 90.69 | 68.74 | 9.18 | 19.92 | 12.61 | 43.96 | 34.28 | 61.41 | 109.32 | 23.73 | 377.08 | 21.93 | 3.07 | 6.19 | 472.14 | 11.73 | 1.42 | 32.16 | 24.28 | 3.54 |
| ZQ-34 | 50.36 | 2.75 | 252.85 | 25.89 | 7143.43 | 144.95 | 76.68 | 181.35 | 11.67 | 21.32 | 10.44 | 63.92 | 37.79 | 94.94 | 79.37 | 34.60 | 504.30 | 27.25 | 4.05 | 11.09 | 326.11 | 15.44 | 1.86 | 32.97 | 24.22 | 3.90 |
| ZQ-35 | 30.16 | 3.14 | 169.63 | 22.40 | 7383.69 | 145.67 | 87.85 | 36.23 | 6.13 | 21.47 | 6.75 | 44.80 | 36.49 | 89.59 | 73.05 | 22.16 | 365.31 | 32.83 | 5.05 | 9.68 | 307.90 | 11.62 | 2.21 | 25.59 | 28.78 | 3.90 |
| ZQ-36 | 24.87 | 2.64 | 259.86 | 21.48 | 6319.03 | 107.84 | 78.23 | 70.16 | 10.41 | 21.95 | 9.12 | 91.74 | 35.32 | 92.31 | 99.76 | 26.07 | 349.00 | 27.31 | 4.37 | 10.59 | 317.94 | 10.89 | 1.83 | 40.19 | 22.92 | 3.15 |
| ZQ-37 | 74.20 | 1.93 | 326.27 | 25.94 | 11038.74 | 260.75 | 217.22 | 27.93 | 3.44 | 25.36 | 5.76 | 19.64 | 45.94 | 63.57 | 143.99 | 32.55 | 592.87 | 56.70 | 7.52 | 3.96 | 306.22 | 18.43 | 3.93 | 34.57 | 51.69 | 7.71 |
| ZQ-38 | 29.48 | 3.79 | 239.95 | 21.93 | 5207.84 | 140.45 | 67.95 | 88.35 | 7.80 | 14.11 | 6.60 | 38.80 | 32.65 | 92.62 | 99.58 | 39.51 | 367.57 | 26.36 | 3.88 | 7.87 | 360.93 | 11.52 | 1.74 | 37.77 | 25.69 | 3.72 |
| ZQ-39 | 40.47 | 3.34 | 298.22 | 20.17 | 6382.65 | 92.17 | 64.85 | 108.37 | 9.85 | 15.22 | 50.20 | 61.35 | 40.15 | 65.31 | 91.58 | 41.98 | 634.80 | 42.61 | 30.71 | 5.35 | 320.20 | 19.16 | 2.67 | 77.84 | 29.75 | 3.63 |
| ZQ-40 | 55.53 | 3.84 | 420.75 | 30.69 | 6534.60 | 163.00 | 104.21 | 68.02 | 10.37 | 33.44 | 13.81 | 57.02 | 40.87 | 67.49 | 130.19 | 65.52 | 386.06 | 27.28 | 4.52 | 9.92 | 247.91 | 12.17 | 1.87 | 45.84 | 28.73 | 5.98 |
| ZQ-41 | 35.85 | 2.23 | 221.46 | 31.86 | 6672.67 | 125.82 | 75.50 | 78.34 | 5.32 | 16.50 | 10.38 | 29.23 | 46.31 | 90.53 | 59.20 | 18.23 | 378.71 | 31.47 | 4.37 | 7.80 | 306.59 | 11.73 | 1.98 | 42.26 | 26.85 | 3.00 |
| ZQ-42 | 36.69 | 3.35 | 357.61 | 23.17 | 6209.74 | 139.60 | 116.94 | 88.82 | 6.61 | 68.73 | 11.52 | 81.46 | 35.96 | 111.61 | 91.37 | 33.29 | 346.41 | 29.03 | 3.17 | 10.82 | 315.26 | 10.93 | 2.04 | 30.52 | 27.58 | 3.90 |
| ZQ-43 | 104.96 | 2.05 | 283.94 | 25.35 | 7700.67 | 150.74 | 110.42 | 30.29 | 2.87 | 356.77 | 17.13 | 31.81 | 33.32 | 140.28 | 173.98 | 34.83 | 359.89 | 37.23 | 6.39 | 23.67 | 258.01 | 11.46 | 2.86 | 39.47 | 38.38 | 6.32 |
| ZQ-44 | 113.16 | 2.18 | 328.05 | 21.39 | 8143.72 | 111.63 | 117.30 | 42.53 | 4.57 | 46.90 | 10.26 | 30.57 | 37.19 | 107.12 | 139.41 | 33.08 | 407.89 | 41.52 | 6.07 | 17.08 | 203.42 | 12.96 | 3.23 | 37.50 | 35.22 | 4.69 |
| ZQ-45 | 27.24 | 3.30 | 250.97 | 25.36 | 5547.58 | 134.46 | 78.00 | 123.50 | 10.96 | 21.19 | 7.43 | 51.10 | 34.77 | 93.77 | 111.15 | 33.70 | 312.32 | 24.22 | 3.18 | 8.89 | 339.11 | 10.10 | 1.64 | 29.59 | 24.15 | 3.76 |
| ZQ-46 | 74.03 | 3.53 | 206.82 | 27.18 | 6003.08 | 148.61 | 83.09 | 46.01 | 9.26 | 73.06 | 21.76 | 43.32 | 38.66 | 83.66 | 93.46 | 29.45 | 348.62 | 25.56 | 26.03 | 8.85 | 322.97 | 11.23 | 1.76 | 29.47 | 24.13 | 3.85 |
| ZQ-47 | 83.33 | 2.93 | 273.55 | 24.54 | 6834.99 | 142.94 | 103.01 | 46.67 | 7.48 | 331.56 | 18.13 | 47.47 | 35.77 | 109.74 | 137.02 | 34.23 | 365.46 | 33.82 | 17.38 | 18.88 | 250.41 | 11.62 | 2.45 | 24.64 | 34.11 | 4.94 |
| ZQ-48 | 25.90 | 3.48 | 201.13 | 41.63 | 5975.52 | 175.44 | 85.62 | 80.82 | 10.20 | 26.46 | 7.13 | 35.27 | 39.15 | 83.93 | 77.94 | 29.23 | 355.16 | 25.62 | 4.87 | 9.69 | 310.49 | 11.73 | 1.73 | 33.99 | 25.65 | 4.03 |
